# Supplementary material for: Efficacy and Safety of Esaxerenone in Hypertensive Patients with Diabetes Mellitus Undergoing Treatment with Sodium-Glucose Cotransporter 2 Inhibitors (EAGLE-DH)
Source: Springer Nature journal article supplement (doi:10.1007/s12325-023-02633-8), 2023-09-21
Supplement: MOESM1 [file 26069982]

**Efficacy and safety of esaxerenone in hypertensive patients with diabetes mellitus undergoing treatment with sodium-glucose cotransporter 2 inhibitors (EAGLE-DH)**

Hirohiko Motoki1, Yoshito Inobe2, Toshiki Fukui3, Arata Iwasaki4, Shinya Hiramitsu5, Sekiya Koyama6, Izuru Masuda7, Noriyuki Sekimura8, Kazuya Yamamoto9, Ai Sato10, Mitsuhisa Komatsu10, Takashi Taguchi11, Kazuhito Shiosakai12, Kotaro Sugimoto11, Koichiro Kuwahara1

1Department of Cardiovascular Medicine, Shinshu University School of Medicine, 3-1-1 Asahi, Matsumoto, Nagano 390-8621, Japan

2Inobe Funai Clinic, 1-3-23 Funaicho, Oita, Oita 870-0021, Japan

3Olive Takamatsu Medical Clinic, 649-8 Kankocho, Takamatsu, Kagawa 760-0076, Japan

4Asamoto Internal Medicine Clinic, 1 Hottacho, Fukakusa, Fushimi-ku, Kyoto 612-0026, Japan

5Hiramitsu Heart Clinic, 2-35 Shiroshitacho, Minami-ku, Nagoya, Aichi 457-0047, Japan

6Koyama Medical Clinic, 2-3-29 Kitafukashi, Matsumoto, Nagano 390-0872, Japan

7Koseikai Clinic, 277 Aburanokoji-dori, Shimouonotanasagaru Aburanokoji-cho, Shimogyo-ku, Kyoto 600-8231, Japan

8Department of Cardiovascular Medicine, National Hospital Organization Matsumoto Medical Center, 2-20-30 Muraimachiminami, Matsumoto, Nagano 399-8701, Japan

9Department of Cardiology, Iida Municipal Hospital, 438 Yawatamachi, Iida, Nagano 395-8502, Japan

10Division of Diabetes, Endocrinology and Metabolism, Department of Internal Medicine, Shinshu University Hospital, 3-1-1 Asahi, Matsumoto, Nagano 390-8621, Japan

11Primary Medical Science Department, Daiichi Sankyo Co., Ltd., 3-5-1 Nihonbashi Honcho, Chuo-ku, Tokyo 103-8426, Japan

12Data Intelligence Department, Daiichi Sankyo Co., Ltd., 1-2-58 Hiromachi, Shinagawa-ku, Tokyo 140-8710, Japan

## Corresponding Author

Koichiro Kuwahara

Email: kkuwah@shinshu-u.ac.jp

# Supplementary Materials

## Fig. S1 Study design

## Fig. S2 Time course change (A) and changes from baseline (B) in bedtime home blood pressure (full analysis set).

## Fig. S3 Time course change (A) and changes from baseline (B) in office blood pressure (full analysis set).

## Fig. S4 Time course changes from baseline in eGFR (A) and serum potassium levels (B) during the study period in the total population and eGFR subcohorts (safety analysis set).

## Table S1. List of participating institutions and representative physicians

**Table S2.** Change from baseline in BP (full analysis set)

**Table S3.** Change from baseline in BP (per protocol set)

**Table S4.** Achievement rate of target BP levels at Week 24 (full analysis set)

**Table S5.** Achievement rate of target BP levels at Week 24 (per protocol set)

## Table S6. Change in urinary albumin-to-creatinine ratio (mg/gCr) from baseline to Weeks 12 and 24 in the total population and eGFR subcohorts (full analysis set)

**Table S7.** Change in urinary albumin-to-creatinine ratio (mg/gCr) from baseline to Weeks 12 and 24 in the total population and eGFR subcohorts (per protocol set)

**Table S8.** Change in biomarker data from baseline to Week 12 and 24 in the total population and eGFR subcohorts (full analysis set)

**Table S9.** Change in biomarker data from baseline to Week 12 and 24 in the total population and eGFR subcohorts (per protocol set)

**Table S10.** Incidence of serum potassium level ≥ 5.5 and ≥ 6.0 mEq/L (safety analysis set)

# Supplementary Figure Legends

## Fig. S1 Study design

If serum potassium levels were > 5.0 to < 5.5 mEq/L, a dose reduction of esaxerenone was considered; if serum potassium levels were ≥ 5.5 to < 6.0 mEq/L, the esaxerenone dose was reduced or esaxerenone was discontinued; and if serum potassium levels were ≥ 6.0 mEq/L, esaxerenone was discontinued immediately. The entire treatment period lasted 24 weeks.

*BP* blood pressure, *CCB* calcium channel blocker, *eGFR* creatinine-based estimated glomerular filtration rate, *K* potassium, *RAS* renin–angiotensin system, *SGLT2* sodium-glucose cotransporter-2, *UACR* urinary albumin-to-creatinine ratio.

**
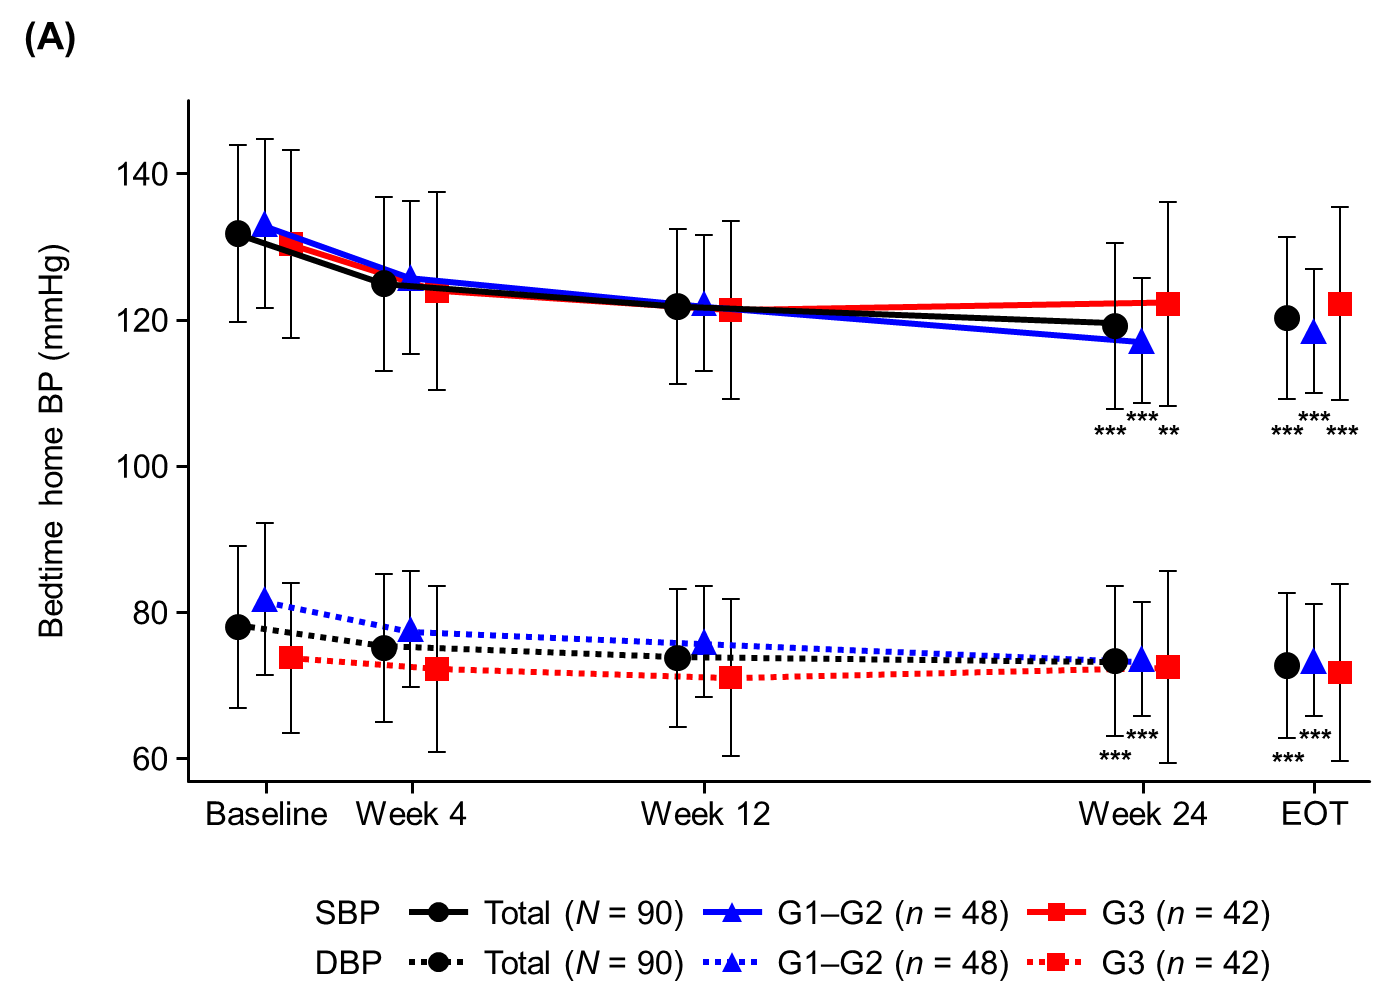
**

**
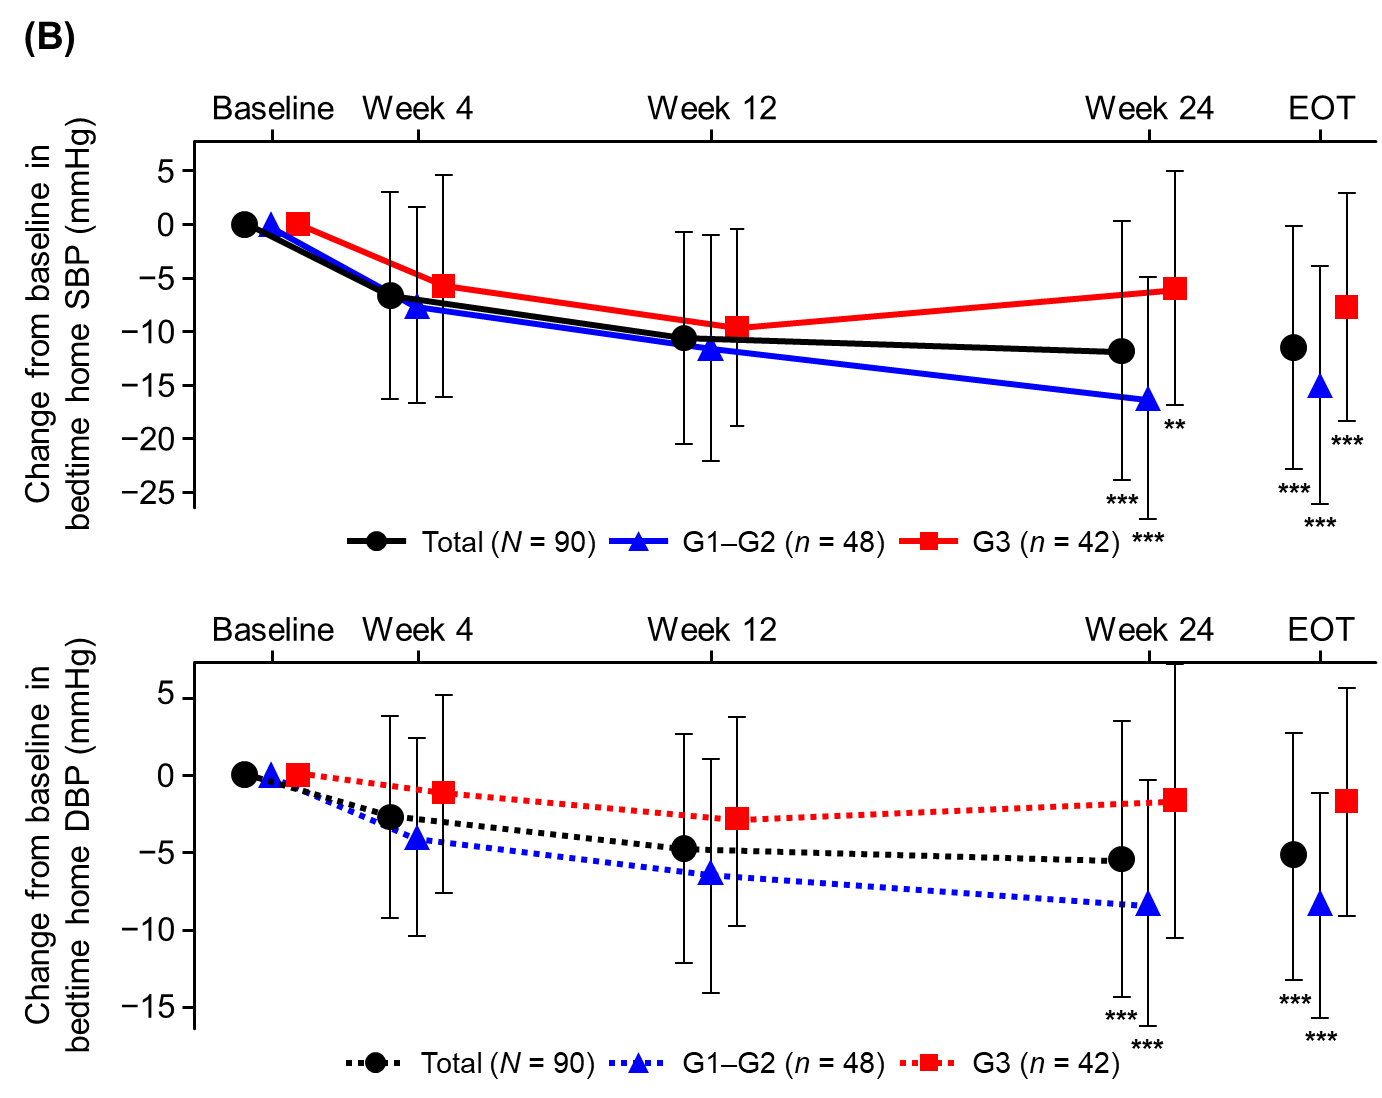
**

## Fig. S2 Time course change (A) and changes from baseline (B) in bedtime home blood pressure (full analysis set).

Data are mean ± standard deviation.

** *P* < 0.01, *** *P* < 0.001 vs. baseline, paired *t*-test.

*BP* blood pressure, *DBP* diastolic blood pressure, *EOT* end of treatment, *SBP* systolic blood pressure.

**
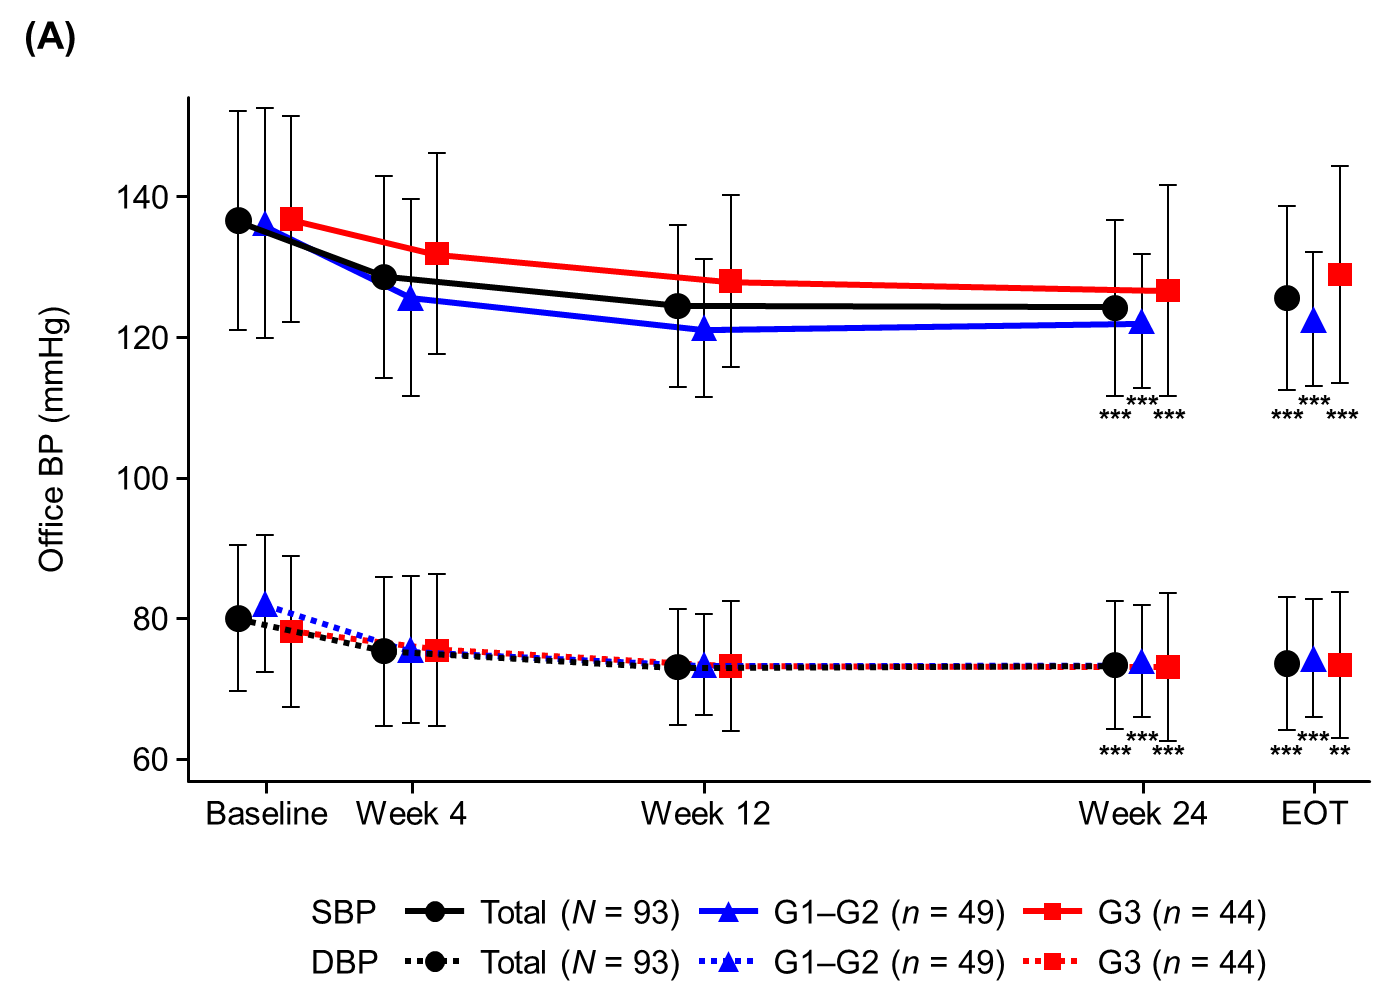
**

**
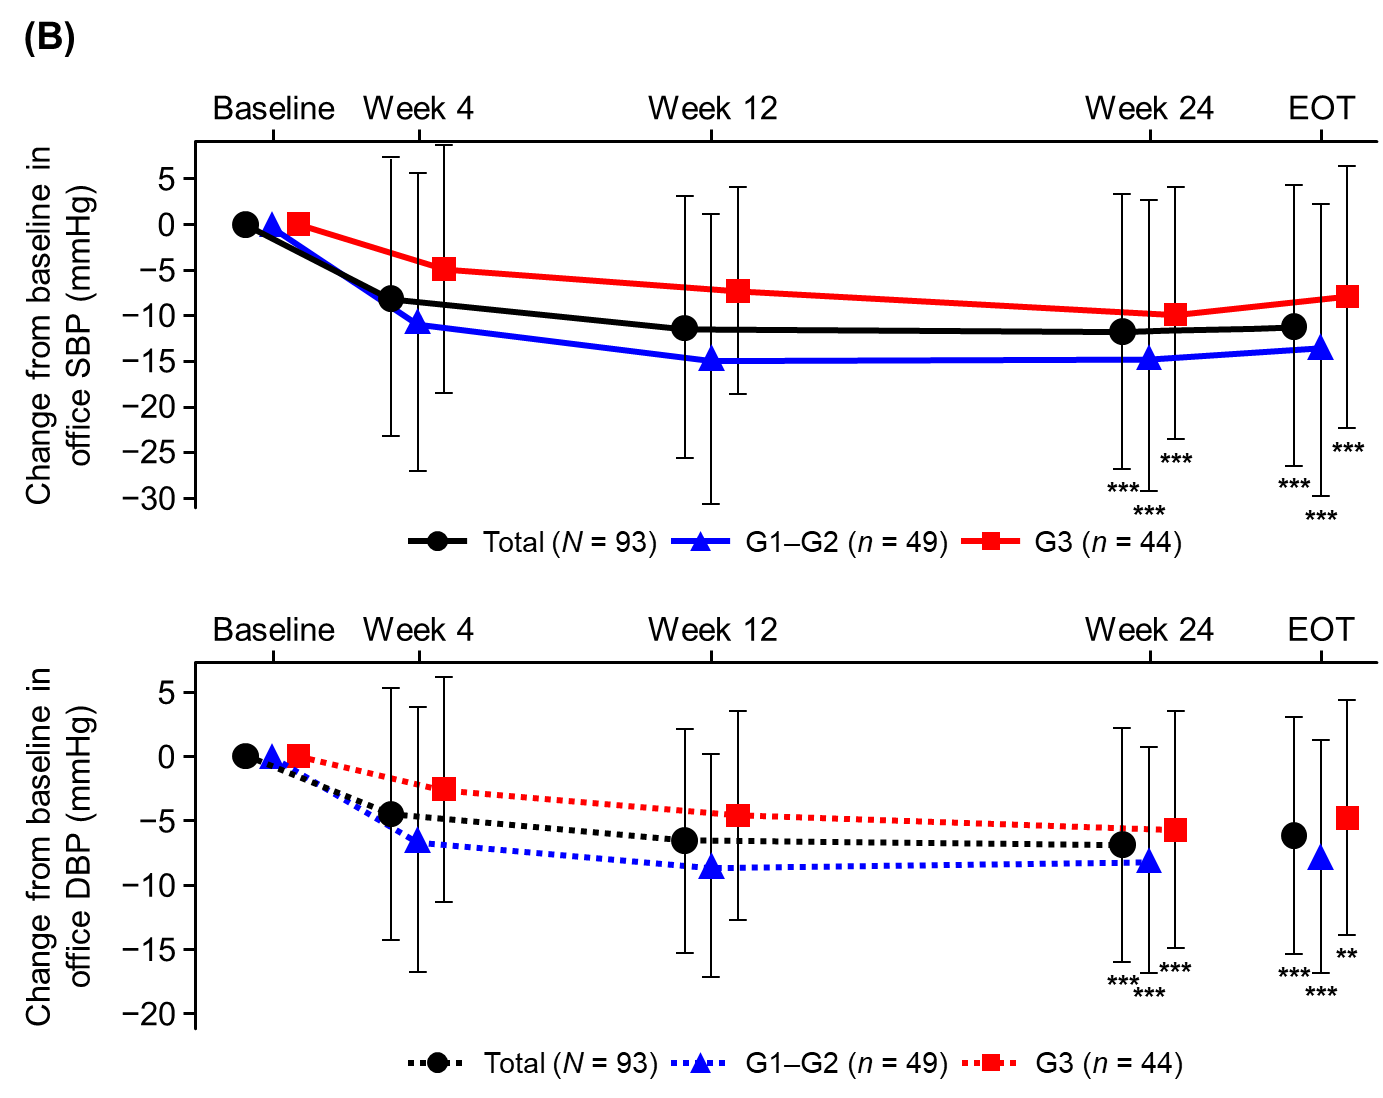
**

## Fig. S3 Time course change (A) and changes from baseline (B) in office blood pressure (full analysis set).

Data are mean ± standard deviation.

** *P* < 0.01, *** *P* < 0.001 vs. baseline, paired *t*-test.

*BP* blood pressure, *DBP* diastolic blood pressure, *EOT* end of treatment, *SBP* systolic blood pressure.


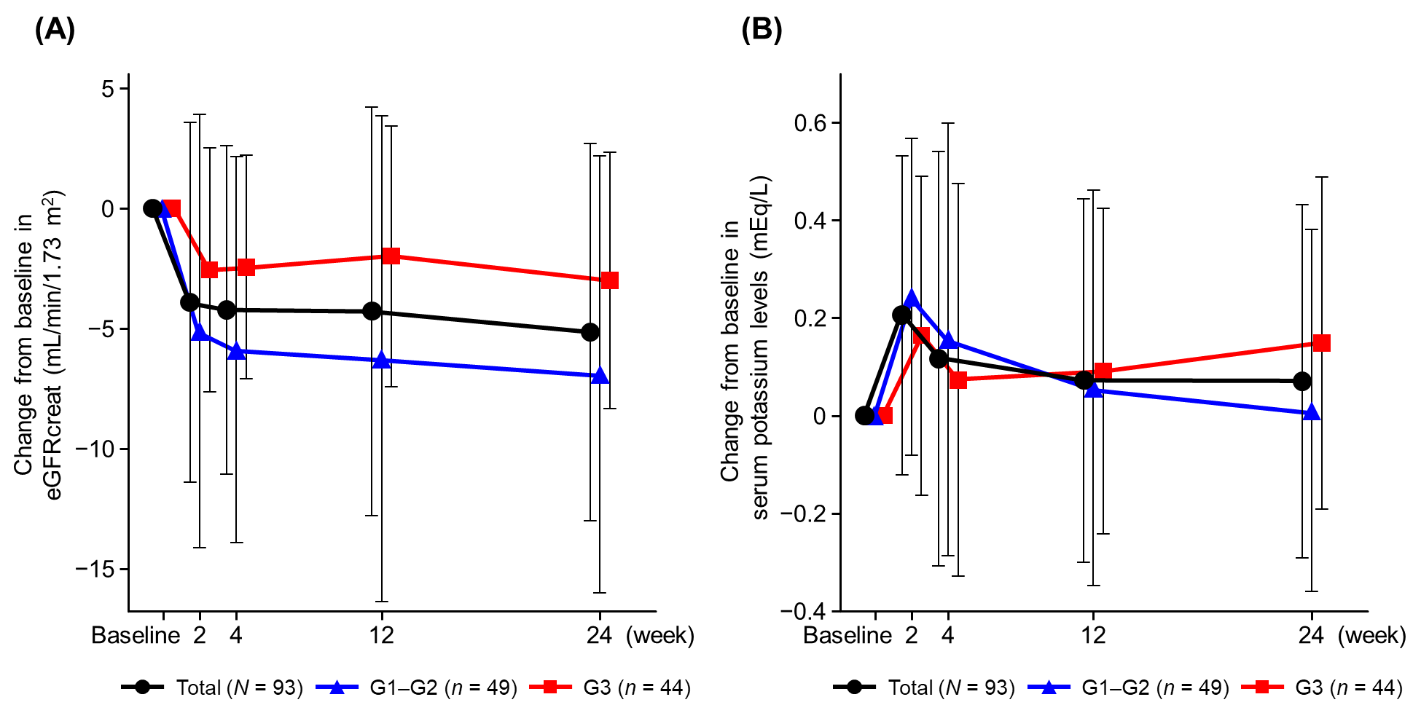


## Fig. S4 Time course changes from baseline in eGFR (A) and serum potassium levels (B) during the study period in the total population and eGFR subcohorts (safety analysis set).

Data are mean ± standard deviation.

*eGFR* creatinine-based estimated glomerular filtration rate.

**Table S1.** List of participating institutions and representative physiciansa

| **Institution** | **Representative physicians** |
| --- | --- |
| Department of Cardiovascular Medicine, Shinshu University School of Medicine | Hirohiko Motoki (principal investigator) |
| Asamoto Internal Medicine Clinic | Arata Iwasaki |
| Chusho Clinic | Hideki Chusho |
| Division of Diabetes, Endocrinology and Metabolism, Department of Internal Medicine, Shinshu University Hospital | Mitsuhisa Komatsu |
| Gibo Hepatology Clinic | Yukio Gibo |
| Goshominami Harashima Clinic | Shin-ichi Harashima |
| Hiramitsu Heart Clinic | Shinya Hiramitsu |
| Hokushin General Hospitalb | Hiroshi Kamijo  Kazuhiko Hora  Tetsuya Yoshida |
| Iida Municipal Hospital | Kazuya Yamamoto |
| Ijinkai Takeda General Hospital | Nobuyuki Azuma |
| Ina Central Hospital | Hiroshi Kitabayashi |
| Inobe Funai Clinic | Yoshito Inobe |
| Kang Medical Clinic | Shino Kan |
| Kenwakai Hospital | Etsuko Kumagai |
| Koseikai Clinic | Izuru Masuda |
| Koyama Medical Clinic | Sekiya Koyama |
| Matsumoto Medical Center | Megumi Koshikawa |
| Nagano Municipal Hospitalb | Takashi Miura  Toshio Kasai |
| Nagano Red Cross Hospital | Nobuyuki Urasawa |
| North Alps Medical Center Azumi Hospital | Shinichi Aso |
| Okaya City Hospital | Takashi Midorikawa |
| Olive Takamatsu Medical Clinic | Toshiki Fukui |
| Saku Central Hospital Advanced Care Center | Yoshikazu Yazaki |
| Shinshu Ueda Medical Centerb | Wataru Takahashi  Kiu Tanaka |

a Institutions are listed in alphabetical order except for Shinshu University School of Medicine.

b Facilities where there was a change in the principal investigator during the course of the study.

**Table S2.** Change from baseline in BP (full analysis set)

|  | **Total**  ***N* = 93** | | **eGFR subcohorts** | | | |
| --- | --- | --- | --- | --- | --- | --- |
| **G1–G2 subcohort**  **(≥ 60 mL/min/1.73 m2)**  ***n* = 49** | | **G3 subcohort**  **(30 to < 60 mL/min/1.73 m2)**  ***n* = 44** | |
|  | SBP, mmHg | DBP, mmHg | SBP, mmHg | DBP, mmHg | SBP, mmHg | DBP, mmHg |
| Morning home BP |  |  |  |  |  |  |
| Baseline, *n* | 93 | 93 | 49 | 49 | 44 | 44 |
| Mean ± SD | 136.4 ± 10.8 | 82.3 ± 9.6 | 137.0 ± 9.8 | 85.5 ± 7.9 | 135.6 ± 11.8 | 78.7 ± 10.1 |
| Week 4, *n* | 92 | 92 | 48 | 48 | 44 | 44 |
| Mean ± SD | 128.6 ± 11.2 | 79.5 ± 9.3 | 128.6 ± 10.1 | 81.9 ± 8.0 | 128.6 ± 12.5 | 76.9 ± 10.1 |
| Change from baseline | −7.9 ± 8.9 | −2.8 ± 5.2 | −8.6 ± 7.8 | −3.7 ± 4.5 | −7.0 ± 9.9 | −1.9 ± 5.8 |
| Week 12, *n* | 83 | 83 | 45 | 45 | 38 | 38 |
| Mean ± SD | 125.2 ± 11.2 | 77.6 ± 9.0 | 124.5 ± 10.1 | 79.2 ± 7.7 | 126.1 ± 12.5 | 75.9 ± 10.1 |
| Change from baseline | −11.8 ± 10.8*** | −5.1 ± 6.3*** | −13.2 ± 10.6*** | −6.9 ± 6.2*** | −10.1 ± 10.8*** | −3.1 ± 5.7** |
| Week 12 (LOCF), *n* | 92 | 92 | 48 | 48 | 44 | 44 |
| Mean ± SD | 125.3 ± 10.8 | 77.5 ± 8.9 | 124.5 ± 9.8 | 79.0 ± 7.9 | 126.1 ± 11.8 | 75.9 ± 9.7 |
| Change from baseline | −11.2 ± 10.7*** | −4.8 ± 6.2*** | −12.7 ± 10.6*** | −6.6 ± 6.2*** | −9.5 ± 10.6*** | −2.9 ± 5.6** |
| Week 24, *n* | 62 | 62 | 36 | 36 | 26 | 26 |
| Mean ± SD | 122.8 ± 9.6 | 77.3 ± 8.7 | 120.4 ± 7.7 | 78.0 ± 7.1 | 126.1 ± 11.1 | 76.3 ± 10.7 |
| Change from baseline | −12.9 ± 10.5*** | −5.7 ± 6.3*** | −16.5 ± 9.7*** | −7.7 ± 6.0*** | −8.0 ± 9.8*** | −3.0 ± 5.9* |
| EOT, *n* | 92 | 92 | 48 | 48 | 44 | 44 |
| Mean ± SD | 124.4 ± 10.2 | 77.1 ± 8.9 | 122.1 ± 8.3 | 78.3 ± 7.4 | 126.8 ± 11.5 | 75.9 ± 10.2 |
| Change from baseline | −12.1 ± 10.9*** | −5.2 ± 6.0*** | −15.2 ± 10.6*** | −7.3 ± 5.7*** | −8.8 ± 10.3*** | −2.8 ± 5.6** |
| Bedtime home BP |  |  |  |  |  |  |
| Baseline, *n* | 90 | 90 | 48 | 48 | 42 | 42 |
| Mean ± SD | 131.9 ± 12.2 | 78.0 ± 11.1 | 133.2 ± 11.5 | 81.8 ± 10.4 | 130.3 ± 12.8 | 73.8 ± 10.3 |
| Week 4, *n* | 89 | 89 | 47 | 47 | 42 | 42 |
| Mean ± SD | 125.0 ± 12.0 | 75.1 ± 10.1 | 125.8 ± 10.4 | 77.7 ± 7.9 | 124.0 ± 13.5 | 72.2 ± 11.4 |
| Change from baseline | −6.7 ± 9.7 | −2.7 ± 6.6 | −7.5 ± 9.1 | −4.1 ± 6.4 | −5.8 ± 10.3 | −1.1 ± 6.4 |
| Week 12, *n* | 80 | 80 | 44 | 44 | 36 | 36 |
| Mean ± SD | 121.9 ± 10.6 | 73.8 ± 9.5 | 122.3 ± 9.2 | 76.1 ± 7.6 | 121.3 ± 12.2 | 71.1 ± 10.8 |
| Change from baseline | −10.6 ± 9.9*** | −4.8 ± 7.5*** | −11.5 ± 10.5*** | −6.5 ± 7.7*** | −9.6 ± 9.2*** | −2.9 ± 6.8* |
| Week 12 (LOCF), *n* | 89 | 89 | 47 | 47 | 42 | 42 |
| Mean ± SD | 121.7 ± 10.5 | 73.2 ± 9.5 | 122.3 ± 9.1 | 75.3 ± 8.1 | 121.0 ± 11.9 | 70.9 ± 10.4 |
| Change from baseline | −10.1 ± 9.8*** | −4.7 ± 7.3*** | −11.1 ± 10.4*** | −6.6 ± 7.6*** | −9.0 ± 9.2*** | −2.6 ± 6.4* |
| Week 24, *n* | 61 | 61 | 35 | 35 | 26 | 26 |
| Mean ± SD | 119.2 ± 11.3 | 73.2 ± 10.3 | 117.1 ± 8.5 | 73.7 ± 7.8 | 122.2 ± 13.9 | 72.6 ± 13.2 |
| Change from baseline | −11.8 ± 12.1*** | −5.5 ± 8.9*** | −16.2 ± 11.2*** | −8.4 ± 8.0*** | −6.0 ± 10.9** | −1.7 ± 8.8 |
| EOT, *n* | 89 | 89 | 47 | 47 | 42 | 42 |
| Mean ± SD | 120.3 ± 11.2 | 72.7 ± 10.0 | 118.5 ± 8.5 | 73.4 ± 7.7 | 122.2 ± 13.3 | 71.8 ± 12.1 |
| Change from baseline | −11.5 ± 11.3*** | −5.3 ± 8.1*** | −14.9 ± 11.0*** | −8.4 ± 7.4*** | −7.7 ± 10.6*** | −1.7 ± 7.5 |
| Office BP |  |  |  |  |  |  |
| Baseline, *n* | 93 | 93 | 49 | 49 | 44 | 44 |
| Mean ± SD | 136.5 ± 15.5 | 80.0 ± 10.4 | 136.2 ± 16.5 | 81.9 ± 9.7 | 136.8 ± 14.7 | 77.9 ± 10.8 |
| Week 4, *n* | 92 | 92 | 48 | 48 | 44 | 44 |
| Mean ± SD | 128.5 ± 14.4 | 75.3 ± 10.6 | 125.5 ± 14.0 | 75.4 ± 10.5 | 131.9 ± 14.3 | 75.3 ± 10.8 |
| Change from baseline | −8.0 ± 15.3 | −4.6 ± 9.9 | −10.7 ± 16.3 | −6.5 ± 10.4 | −5.0 ± 13.6 | −2.6 ± 8.9 |
| Week 12, *n* | 86 | 86 | 46 | 46 | 40 | 40 |
| Mean ± SD | 124.4 ± 11.5 | 73.1 ± 8.3 | 121.2 ± 9.9 | 73.2 ± 7.2 | 128.0 ± 12.3 | 73.0 ± 9.4 |
| Change from baseline | −11.3 ± 14.4*** | −6.8 ± 8.7*** | −14.8 ± 15.9*** | −8.6 ± 8.8*** | −7.4 ± 11.3*** | −4.7 ± 8.2*** |
| Week 12 (LOCF), *n* | 92 | 92 | 48 | 48 | 44 | 44 |
| Mean ± SD | 125.5 ± 12.3 | 73.6 ± 8.5 | 121.7 ± 9.9 | 73.8 ± 7.8 | 129.7 ± 13.4 | 73.4 ± 9.2 |
| Change from baseline | −11.0 ± 14.4*** | −6.4 ± 8.7*** | −14.6 ± 15.6*** | −8.1 ± 9.1*** | −7.2 ± 11.9*** | −4.5 ± 8.0*** |
| Week 24, *n* | 81 | 81 | 45 | 45 | 36 | 36 |
| Mean ± SD | 124.2 ± 12.4 | 73.3 ± 9.2 | 122.2 ± 9.5 | 73.6 ± 8.0 | 126.6 ± 15.1 | 73.0 ± 10.6 |
| Change from baseline | −11.8 ± 15.0*** | −7.1 ± 9.1*** | −13.4 ± 15.9*** | −8.1 ± 8.8*** | −9.9 ± 13.8*** | −5.8 ± 9.3*** |
| EOT, *n* | 92 | 92 | 48 | 48 | 44 | 44 |
| Mean ± SD | 125.5 ± 13.1 | 73.6 ± 9.4 | 122.4 ± 9.6 | 74.1 ± 8.5 | 128.8 ± 15.5 | 73.1 ± 10.4 |
| Change from baseline | −11.1 ± 15.5*** | −6.4 ± 9.3*** | −13.9 ± 16.1*** | −7.8 ± 9.2*** | −8.0 ± 14.4*** | −4.8 ± 9.2** |

* *P* < 0.05, ** *P* < 0.01, *** *P* < 0.001 vs. baseline, paired *t*-test.

*P*-values were not calculated for changes from baseline to Week 4.

*BP* blood pressure, *DBP* diastolic blood pressure, *eGFR* creatinine-based estimated glomerular filtration rate, *EOT* end of treatment, *LOCF* last observation carried forward, *SBP* systolic blood pressure, *SD* standard deviation.

**Table S3.** Change from baseline in BP (per protocol set)

|  | **Total**  ***N* = 80** | | **eGFR subcohorts** | | | |
| --- | --- | --- | --- | --- | --- | --- |
| **G1–G2 subcohort**  **(≥ 60 mL/min/1.73 m2)**  ***n* = 36** | | **G3 subcohort**  **(30 to < 60 mL/min/1.73 m2)**  ***n* = 44** | |
|  | SBP, mmHg | DBP, mmHg | SBP, mmHg | DBP, mmHg | SBP, mmHg | DBP, mmHg |
| Morning home BP |  |  |  |  |  |  |
| Baseline, *n* | 80 | 80 | 36 | 36 | 44 | 44 |
| Mean ± SD | 136.2 ± 10.6 | 82.1 ± 9.9 | 137.0 ± 8.9 | 86.2 ± 8.1 | 135.6 ± 11.8 | 78.7 ± 10.1 |
| Week 4, *n* | 79 | 79 | 35 | 35 | 44 | 44 |
| Mean ± SD | 128.9 ± 11.6 | 79.4 ± 9.7 | 129.3 ± 10.4 | 82.7 ± 8.3 | 128.6 ± 12.5 | 76.9 ± 10.1 |
| Change from baseline | −7.5 ± 9.0 | −2.6 ± 5.4 | −8.0 ± 7.7 | −3.6 ± 4.6 | −7.0 ± 9.9 | −1.9 ± 5.8 |
| Week 12, *n* | 71 | 71 | 33 | 33 | 38 | 38 |
| Mean ± SD | 125.3 ± 11.9 | 77.3 ± 9.5 | 124.3 ± 11.2 | 78.9 ± 8.6 | 126.1 ± 12.5 | 75.9 ± 10.1 |
| Change from baseline | −11.6 ± 10.7*** | −5.3 ± 6.3*** | −13.3 ± 10.5*** | −7.9 ± 6.1*** | −10.1 ± 10.8*** | −3.1 ± 5.7** |
| Week 12 (LOCF), *n* | 79 | 79 | 35 | 35 | 44 | 44 |
| Mean ± SD | 125.3 ± 11.4 | 77.1 ± 9.4 | 124.4 ± 10.9 | 78.7 ± 8.9 | 126.1 ± 11.8 | 75.9 ± 9.7 |
| Change from baseline | −11.0 ± 10.6*** | −4.9 ± 6.2*** | −13.0 ± 10.4*** | −7.5 ± 6.1*** | −9.5 ± 10.6*** | −2.9 ± 5.6** |
| Week 24, *n* | 52 | 52 | 26 | 26 | 26 | 26 |
| Mean ± SD | 123.3 ± 10.2 | 77.2 ± 9.4 | 120.4 ± 8.4 | 78.1 ± 7.9 | 126.1 ± 11.1 | 76.3 ± 10.7 |
| Change from baseline | −12.5 ± 10.8*** | −5.7 ± 6.4*** | −17.0 ± 10.0*** | −8.3 ± 6.0*** | −8.0 ± 9.8*** | −3.0 ± 5.9* |
| EOT, *n* | 79 | 79 | 35 | 35 | 44 | 44 |
| Mean ± SD | 124.9 ± 10.7 | 77.1 ± 9.4 | 122.5 ± 9.2 | 78.5 ± 8.3 | 126.8 ± 11.5 | 75.9 ± 10.2 |
| Change from baseline | −11.4 ± 10.5*** | −5.0 ± 6.1*** | −14.8 ± 10.0*** | −7.8 ± 5.6*** | −8.8 ± 10.3*** | −2.8 ± 5.6** |
| Bedtime home BP |  |  |  |  |  |  |
| Baseline, *n* | 77 | 77 | 35 | 35 | 42 | 42 |
| Mean ± SD | 131.9 ± 11.4 | 77.9 ± 10.9 | 133.7 ± 9.3 | 82.9 ± 9.7 | 130.3 ± 12.8 | 73.8 ± 10.3 |
| Week 4, *n* | 76 | 76 | 34 | 34 | 42 | 42 |
| Mean ± SD | 125.0 ± 12.1 | 74.9 ± 10.3 | 126.3 ± 10.1 | 78.2 ± 7.6 | 124.0 ± 13.5 | 72.2 ± 11.4 |
| Change from baseline | −6.6 ± 9.8 | −2.7 ± 6.8 | −7.5 ± 9.2 | −4.7 ± 6.8 | −5.8 ± 10.3 | −1.1 ± 6.4 |
| Week 12, *n* | 68 | 68 | 32 | 32 | 36 | 36 |
| Mean ± SD | 121.5 ± 10.7 | 73.1 ± 9.6 | 121.6 ± 8.9 | 75.3 ± 7.7 | 121.3 ± 12.2 | 71.1 ± 10.8 |
| Change from baseline | −11.0 ± 9.6*** | −5.3 ± 7.4*** | −12.5 ± 9.9*** | −8.0 ± 7.2*** | −9.6 ± 9.2*** | −2.9 ± 6.8* |
| Week 12 (LOCF), *n* | 76 | 76 | 34 | 34 | 42 | 42 |
| Mean ± SD | 121.3 ± 10.6 | 72.6 ± 9.6 | 121.6 ± 8.8 | 74.8 ± 8.1 | 121.0 ± 11.9 | 70.9 ± 10.4 |
| Change from baseline | −10.5 ± 9.5*** | −5.2 ± 7.2*** | −12.4 ± 9.7*** | −8.3 ± 7.0*** | −9.0 ± 9.2*** | −2.6 ± 6.4* |
| Week 24, *n* | 51 | 51 | 25 | 25 | 26 | 26 |
| Mean ± SD | 119.3 ± 11.6 | 72.9 ± 10.7 | 116.4 ± 7.9 | 73.2 ± 7.7 | 122.2 ± 13.9 | 72.6 ± 13.2 |
| Change from baseline | −11.6 ± 12.2*** | −5.7 ± 9.4*** | −17.4 ± 10.8*** | −9.8 ± 8.2*** | −6.0 ± 10.9** | −1.7 ± 8.8 |
| EOT, *n* | 76 | 76 | 34 | 34 | 42 | 42 |
| Mean ± SD | 120.5 ± 11.5 | 72.4 ± 10.3 | 118.2 ± 8.4 | 73.2 ± 7.5 | 122.2 ± 13.3 | 71.8 ± 12.1 |
| Change from baseline | −11.3 ± 11.0*** | −5.3 ± 8.5*** | −15.8 ± 10.0*** | −9.9 ± 7.5*** | −7.7 ± 10.6*** | −1.7 ± 7.5 |
| Office BP |  |  |  |  |  |  |
| Baseline, *n* | 80 | 80 | 36 | 36 | 44 | 44 |
| Mean ± SD | 134.8 ± 14.5 | 78.7 ± 9.9 | 132.2 ± 14.0 | 79.6 ± 8.6 | 136.8 ± 14.7 | 77.9 ± 10.8 |
| Week 4, *n* | 79 | 79 | 35 | 35 | 44 | 44 |
| Mean ± SD | 128.6 ± 15.1 | 74.9 ± 10.8 | 124.5 ± 15.2 | 74.5 ± 11.0 | 131.9 ± 14.3 | 75.3 ± 10.8 |
| Change from baseline | −6.1 ± 14.7 | −3.7 ± 9.6 | −7.6 ± 16.1 | −5.1 ± 10.5 | −5.0 ± 13.6 | −2.6 ± 8.9 |
| Week 12, *n* | 74 | 74 | 34 | 34 | 40 | 40 |
| Mean ± SD | 124.8 ± 11.6 | 72.7 ± 8.3 | 121.0 ± 9.6 | 72.3 ± 6.9 | 128.0 ± 12.3 | 73.0 ± 9.4 |
| Change from baseline | −9.1 ± 13.0*** | −5.8 ± 8.4*** | −11.1 ± 14.6*** | −7.1 ± 8.5*** | −7.4 ± 11.3*** | −4.7 ± 8.2*** |
| Week 12 (LOCF), *n* | 79 | 79 | 35 | 35 | 44 | 44 |
| Mean ± SD | 125.9 ± 12.5 | 73.2 ± 8.6 | 121.3 ± 9.5 | 73.0 ± 7.8 | 129.7 ± 13.4 | 73.4 ± 9.2 |
| Change from baseline | −8.8 ± 13.1*** | −5.4 ± 8.4*** | −10.8 ± 14.5*** | −6.6 ± 8.9*** | −7.2 ± 11.9*** | −4.5 ± 8.0*** |
| Week 24, *n* | 70 | 70 | 34 | 34 | 36 | 36 |
| Mean ± SD | 124.2 ± 12.9 | 72.8 ± 9.3 | 121.6 ± 9.7 | 72.6 ± 7.8 | 126.6 ± 15.1 | 73.0 ± 10.6 |
| Change from baseline | −10.2 ± 13.8*** | −6.3 ± 9.0*** | −10.5 ± 14.0*** | −6.9 ± 8.7*** | −9.9 ± 13.8*** | −5.8 ± 9.3*** |
| EOT, *n* | 79 | 79 | 35 | 35 | 44 | 44 |
| Mean ± SD | 125.7 ± 13.6 | 73.1 ± 9.6 | 121.8 ± 9.6 | 73.2 ± 8.6 | 128.8 ± 15.5 | 73.1 ± 10.4 |
| Change from baseline | −9.0 ± 14.1*** | −5.5 ± 9.1*** | −10.3 ± 13.8*** | −6.4 ± 9.0*** | −8.0 ± 14.4*** | −4.8 ± 9.2** |

* *P* < 0.05, ** *P* < 0.01, *** *P* < 0.001 vs. baseline, paired *t*-test.

*P*-values were not calculated for changes from baseline to Week 4.

*BP* blood pressure, *DBP* diastolic blood pressure, *eGFR* creatinine-based estimated glomerular filtration rate, *EOT* end of treatment, *LOCF* last observation carried forward, *SBP* systolic blood pressure, *SD* standard deviation.

**Table S4.** Achievement rate of target BP levels at Week 24 (full analysis set)

|  | **Total**  ***N* = 93** | **eGFR subcohorts** | |
| --- | --- | --- | --- |
| **G1–G2 subcohort**  **(≥ 60 mL/min/1.73 m2)**  ***n* = 49** | **G3 subcohort**  **(30 to < 60 mL/min/1.73 m2)**  ***n* = 44** |
| Morning home |  |  |  |
| *n* (%)  95% CI | 22 (23.7)  [15.5, 33.6] | 14 (28.6)  [16.6, 43.3] | 8 (18.2)  [8.2, 32.7] |
| Bedtime home BP |  |  |  |
| *n* (%)  95% CI | 32 (34.4)  [24.9, 45.0] | 20 (40.8)  [27.0, 55.8] | 12 (27.3)  [15.0, 42.8] |
| Office BP |  |  |  |
| *n* (%)  95% CI | 49 (52.7)  [42.1, 63.1] | 30 (61.2)  [46.2, 74.8] | 19 (43.2)  [28.3, 59.0] |

95% CIs were calculated using the Clopper-Pearson method.

The achievement rate of target BP levels was defined as an office BP < 130/80 mmHg and home BP < 125/75 mmHg in the sitting position at Week 24.

*BP* blood pressure, *CI* confidence interval, *eGFR* creatinine-based estimated glomerular filtration rate.

**Table S5.** Achievement rate of target BP levels at Week 24 (per protocol set)

|  | **Total**  ***N* = 80** | **eGFR subcohorts** | |
| --- | --- | --- | --- |
| **G1–G2 subcohort**  **(≥ 60 mL/min/1.73 m2)**  ***n* = 36** | **G3 subcohort**  **(30 to < 60 mL/min/1.73 m2)**  ***n* = 44** |
| Morning home |  |  |  |
| *n* (%)  95% CI | 19 (23.8)  [14.9, 34.6] | 11 (30.6)  [16.3, 48.1] | 8 (18.2)  [8.2, 32.7] |
| Bedtime home BP |  |  |  |
| *n* (%)  95% CI | 28 (35.0)  [24.7, 46.5] | 16 (44.4)  [27.9, 61.9] | 12 (27.3)  [15.0, 42.8] |
| Office BP |  |  |  |
| *n* (%)  95% CI | 43 (53.8)  [42.2, 65.0] | 24 (66.7)  [49.0, 81.4] | 19 (43.2)  [28.3, 59.0] |

95% CIs were calculated using the Clopper-Pearson method.

The achievement rate of target BP levels was defined as an office BP < 130/80 mmHg and home BP < 125/75 mmHg in the sitting position at Week 24.

*BP* blood pressure, *CI* confidence interval, *eGFR* creatinine-based estimated glomerular filtration rate.

## Table S6. Change in urinary albumin-to-creatinine ratio (mg/gCr) from baseline to Weeks 12 and 24 in the total population and eGFR subcohorts (full analysis set)

|  | **Total**  ***N* = 93** | **eGFR subcohorts** | |
| --- | --- | --- | --- |
| **G1–G2 subcohort**  **(≥ 60 mL/min/1.73 m2)**  ***n* = 49** | **G3 subcohort**  **(30 to < 60 mL/min/1.73 m2)**  ***n* = 44** |
| Baseline, *n* | 93 | 49 | 44 |
| Mean ± SD | 145.3 ± 631.9 | 39.0 ± 62.4 | 263.6 ± 907.1 |
| Week 12, *n* | 84 | 45 | 39 |
| Mean ± SD | 92.0 ± 404.0 | 19.2 ± 37.2 | 176.0 ± 584.2 |
| Change from baseline  95% CI | −65.9 ± 270.8  [−124.7, −7.2] | −20.9 ± 48.7  [−35.5, −6.2] | −117.9 ± 390.2  [−244.4, 8.6] |
| Geometric percentage change from baseline  95% CI | −42.7  [−51.5, −32.3]*** | −47.7  [−58.5, −34.1]*** | −36.3  [−50.1, −18.6]*** |
| Week 24, *n* | 80 | 45 | 35 |
| Mean ± SD | 107.8 ± 572.5 | 14.1 ± 17.2 | 228.2 ± 857.2 |
| Change from baseline  95% CI | −45.7 ± 136.8  [−76.1, −15.2] | −19.4 ± 35.0  [−29.9, −8.9] | −79.5 ± 199.5  [−148.1, −11.0] |
| Geometric percentage change from baseline  95% CI | −49.1  [−55.7, −41.4]*** | −50.8  [−60.1, −39.2]*** | −46.8  [−55.5, −36.4]*** |

*** *P* < 0.001 vs. baseline, paired *t*-test.

*P* values were only presented for geometric percentage change from baseline.

*CI* confidence interval, *eGFR* creatinine-based estimated glomerular filtration rate, *SD* standard deviation.

**Table S7.** Change in urinary albumin-to-creatinine ratio (mg/gCr) from baseline to Weeks 12 and 24 in the total population and eGFR subcohorts (per protocol set)

|  | **Total**  ***N* = 80** | **eGFR subcohorts** | |
| --- | --- | --- | --- |
| **G1–G2 subcohort**  **(≥ 60 mL/min/1.73 m2)**  ***n* = 36** | **G3 subcohort**  **(30 to < 60 mL/min/1.73 m2)**  ***n* = 44** |
| Baseline*, n* | 80 | 36 | 44 |
| Mean ± SD | 151.0 ± 680.9 | 13.5 ± 12.5 | 263.6 ± 907.1 |
| Week 12, *n* | 72 | 33 | 39 |
| Mean ± SD | 98.7 ± 435.7 | 7.5 ± 6.9 | 176.0 ± 584.2 |
| Change from baseline  95% CI | −66.5 ± 291.0  [−134.9, 1.9] | −5.7 ± 8.5  [−8.7, −2.7] | −117.9 ± 390.2  [−244.4, 8.6] |
| Geometric percentage change from baseline  95% CI | −37.8  [−47.3, −26.5]*** | −39.5  [−52.2, −23.5]*** | −36.3  [−50.1, −18.6]*** |
| Week 24, *n* | 69 | 34 | 35 |
| Mean ± SD | 119.1 ± 616.3 | 6.8 ± 5.6 | 228.2 ± 857.2 |
| Change from baseline  95% CI | −43.5 ± 146.0  [−78.6, −8.5] | −6.5 ± 10.7  [−10.2, −2.8] | −79.5 ± 199.5  [−148.1, −11.0] |
| Geometric percentage change from baseline  95% CI | −46.8  [−54.0, −38.3]*** | −46.7  [−58.3, −32.0]*** | −46.8  [−55.5, −36.4]*** |

*** *P* < 0.001 vs. baseline, paired *t*-test.

*P* values were only presented for geometric percentage change from baseline.

*CI* confidence interval, *eGFR* creatinine-based estimated glomerular filtration rate, *SD* standard deviation.

**Table S8.** Change in biomarker data from baseline to Week 12 and 24 in the total population and eGFR subcohorts (full analysis set)

|  |  | **Total**  ***N* = 93** | **eGFR subcohorts** | |
| --- | --- | --- | --- | --- |
| **G1–G2 subcohort**  **(≥ 60 mL/min/1.73 m2)**  ***n* = 49** | **G3 subcohort**  **(30 to < 60 mL/min/1.73 m2)**  ***n* = 44** |
| PAC, pg/mL |  |  |  |  |
| Baseline | Mean ± SD | 46.4 ± 43.3 | 54.9 ± 53.1 | 37.0 ± 26.2 |
| Week 12 | Mean ± SD | 70.5 ± 78.6 | 91.0 ± 96.4 | 47.0 ± 40.8 |
|  | Change from baseline | 24.7 ± 50.3*** | 38.4 ± 60.3*** | 8.9 ± 29.0 |
| Week 24 | Mean ± SD | 78.6 ± 72.4 | 93.4 ± 81.0 | 60.1 ± 55.6 |
|  | Change from baseline | 33.3 ± 53.8*** | 41.0 ± 61.9*** | 23.7 ± 40.4** |
| PRA, ng/mL/hr |  |  |  |  |
| Baseline | Mean ± SD | 5.4 ± 13.7 | 5.8 ± 13.9 | 5.0 ± 13.6 |
| Week 12 | Mean ± SD | 13.1 ± 23.8 | 16.9 ± 29.9 | 8.7 ± 12.6 |
|  | Change from baseline | 7.5 ± 22.2** | 10.8 ± 26.0** | 3.7 ± 16.2 |
| Week 24 | Mean ± SD | 12.2 ± 16.7 | 15.7 ± 20.1 | 7.8 ± 9.8 |
|  | Change from baseline | 7.4 ± 16.9*** | 9.5 ± 21.0** | 4.8 ± 9.4** |
| NT-proBNP, pg/mL |  |  |  |  |
| Baseline | Mean ± SD | 92.2 ± 125.4 | 53.4 ± 52.8 | 138.6 ± 166.2 |
| Week 12 | Mean ± SD | 107.5 ± 193.4 | 47.4 ± 45.1 | 170.6 ± 260.0 |
|  | Change from baseline | −0.4 ± 68.1 | −8.1 ± 31.4 | 8.3 ± 93.7 |
| Week 24 | Mean ± SD | 116.5 ± 238.4 | 43.5 ± 32.6 | 206.6 ± 335.7 |
|  | Change from baseline | 13.8 ± 159.4 | −5.9 ± 22.9 | 39.6 ± 240.7 |
| HbA1c, % |  |  |  |  |
| Baseline | Mean ± SD | 6.8 ± 0.7 | 6.8 ± 0.6 | 6.8 ± 0.8 |
| Week 12 | Mean ± SD | 6.9 ± 0.8 | 7.0 ± 0.8 | 6.9 ± 0.9 |
|  | Change from baseline | 0.2 ± 0.4*** | 0.2 ± 0.3*** | 0.1 ± 0.5 |
| Week 24 | Mean ± SD | 6.9 ± 0.9 | 6.9 ± 0.8 | 6.9 ± 0.9 |
|  | Change from baseline | 0.2 ± 0.5* | 0.2 ± 0.4* | 0.1 ± 0.6 |
| Urinary L-FABP, µg/gCr |  |  |  |  |
| Baseline | Mean ± SD | 7.6 ± 15.4 | 6.4 ± 18.1 | 9.1 ± 11.8 |
| Week 12 | Mean ± SD | 5.9 ± 12.1 | 3.3 ± 5.8 | 8.8 ± 16.2 |
|  | Change from baseline | −1.5 ± 15.2 | −3.3 ± 17.7 | 0.7 ± 11.4 |
| Week 24 | Mean ± SD | 4.7 ± 7.5 | 2.8 ± 2.8 | 7.1 ± 10.4 |
|  | Change from baseline | −2.3 ± 13.6 | −3.8 ± 17.7 | −0.4 ± 4.1 |
| Urinary NAG, U/gCr |  |  |  |  |
| Baseline | Mean ± SD | 11.4 ± 5.6 | 11.1 ± 4.4 | 11.6 ± 6.8 |
| Week 12 | Mean ± SD | 11.5 ± 6.8 | 10.8 ± 6.1 | 12.4 ± 7.5 |
|  | Change from baseline | −0.0 ± 4.7 | −0.5 ± 4.5 | 0.6 ± 4.9 |
| Week 24 | Mean ± SD | 11.0 ± 5.2 | 10.9 ± 4.7 | 11.0 ± 5.7 |
|  | Change from baseline | −0.3 ± 4.2 | −0.2 ± 4.1 | −0.5 ± 4.5 |
| Urinary β2-MG, mg/gCr |  |  |  |  |
| Baseline | Mean ± SD | 1.2 ± 3.5 | 0.5 ± 0.6 | 2.1 ± 4.9 |
| Week 12 | Mean ± SD | 0.8 ± 2.4 | 0.3 ± 0.2 | 1.3 ± 3.4 |
|  | Change from baseline | −0.3 ± 1.3* | −0.3 ± 0.6** | −0.4 ± 1.8 |
| Week 24 | Mean ± SD | 0.5 ± 0.9 | 0.3 ± 0.3 | 0.8 ± 1.3 |
|  | Change from baseline | −0.5 ± 2.3 | −0.1 ± 0.4 | −0.9 ± 3.4 |
| Urinary 8-OHdG, ng/mgCr |  |  |  |  |
| Baseline | Mean ± SD | 3.7 ± 2.7 | 4.5 ± 3.2 | 2.9 ± 1.6 |
| Week 12 | Mean ± SD | 3.7 ± 2.6 | 4.0 ± 2.6 | 3.5 ± 2.7 |
|  | Change from baseline | 0.0 ± 3.3 | −0.5 ± 3.2 | 0.7 ± 3.3 |
| Week 24 | Mean ± SD | 3.2 ± 2.1 | 3.4 ± 2.5 | 3.0 ± 1.6 |
|  | Change from baseline | −0.6 ± 2.7 | −1.0 ± 2.8* | 0.1 ± 2.4 |
| Urinary Na, mEq/L |  |  |  |  |
| Baseline | Mean ± SD | 100.8 ± 41.4 | 105.8 ± 45.3 | 95.3 ± 36.2 |
| Week 12 | Mean ± SD | 103.6 ± 39.0 | 99.9 ± 38.9 | 107.7 ± 39.2 |
|  | Change from baseline | 0.7 ± 44.2 | −7.8 ± 43.6 | 10.2 ± 43.4 |
| Week 24 | Mean ± SD | 104.7 ± 34.3 | 107.4 ± 36.6 | 101.3 ± 31.3 |
|  | Change from baseline | −0.1 ± 40.0 | −0.6 ± 44.8 | 0.6 ± 33.6 |
| Urinary K, mEq/L |  |  |  |  |
| Baseline | Mean ± SD | 38.2 ± 17.6 | 41.0 ± 18.4 | 35.1 ± 16.3 |
| Week 12 | Mean ± SD | 38.8 ± 18.5 | 39.1 ± 18.0 | 38.4 ± 19.2 |
|  | Change from baseline | 0.3 ± 17.9 | −1.3 ± 19.0 | 2.2 ± 16.5 |
| Week 24 | Mean ± SD | 39.5 ± 18.8 | 41.8 ± 17.3 | 36.5 ± 20.3 |
|  | Change from baseline | 1.1 ± 19.4 | 1.7 ± 19.1 | 0.4 ± 20.0 |
| Urinary Na/K ratio |  |  |  |  |
| Baseline | Mean ± SD | 3.3 ± 2.1 | 3.1 ± 2.0 | 3.5 ± 2.2 |
| Week 12 | Mean ± SD | 3.3 ± 2.1 | 3.2 ± 2.1 | 3.5 ± 2.1 |
|  | Change from baseline | 0.0 ± 2.2 | 0.0 ± 2.0 | 0.0 ± 2.3 |
| Week 24 | Mean ± SD | 3.2 ± 1.6 | 3.0 ± 1.5 | 3.4 ± 1.7 |
|  | Change from baseline | −0.2 ± 2.2 | −0.2 ± 2.1 | −0.1 ± 2.3 |

* *P* < 0.05, ** *P* < 0.01, *** *P* < 0.001 vs. baseline, paired *t*-test.

*eGFR* creatinine-based estimated glomerular filtration rate, *HbA1c* glycated hemoglobin, K potassium, L-*FABP* liver-type fatty acid binding protein, *Na* sodium, *NAG* N-acetyl-β-(D)-glucosaminidase, *NT-proBNP* N-terminal pro-brain natriuretic peptide, *PAC* plasma aldosterone concentration, *PRA* plasma renin activity, *β2-MG* β2-microglobulin, *8-OHdG* 8-hydroxydeoxyguanosine, *SD* standard deviation.

**Table S9.** Change in biomarker data from baseline to Week 12 and 24 in the total population and eGFR subcohorts (per protocol set)

|  |  | **Total**  ***N* = 80** | **eGFR subcohorts** | |
| --- | --- | --- | --- | --- |
| **G1–G2 subcohort**  **(≥ 60 mL/min/1.73 m2)**  ***n* = 36** | **G3 subcohort**  **(30 to < 60 mL/min/1.73 m2)**  ***n* = 44** |
| PAC, pg/mL |  |  |  |  |
| Baseline | Mean ± SD | 47.3 ± 46.1 | 59.9 ± 60.4 | 37.0 ± 26.2 |
| Week 12 | Mean ± SD | 72.6 ± 82.6 | 102.7 ± 106.7 | 47.0 ± 40.8 |
|  | Change from baseline | 25.7 ± 52.2*** | 45.6 ± 65.5*** | 8.9 ± 29.0 |
| Week 24 | Mean ± SD | 80.3 ± 72.9 | 101.7 ± 83.2 | 60.1 ± 55.6 |
|  | Change from baseline | 33.9 ± 52.2*** | 44.6 ± 61.2*** | 23.7 ± 40.4** |
| PRA, ng/mL/hr |  |  |  |  |
| Baseline | Mean ± SD | 6.0 ± 14.6 | 7.3 ± 16.0 | 5.0 ± 13.6 |
| Week 12 | Mean ± SD | 14.4 ± 25.3 | 21.2 ± 33.8 | 8.7 ± 12.6 |
|  | Change from baseline | 8.2 ± 23.8** | 13.5 ± 29.7* | 3.7 ± 16.2 |
| Week 24 | Mean ± SD | 12.0 ± 16.2 | 16.4 ± 20.3 | 7.8 ± 9.8 |
|  | Change from baseline | 6.7 ± 16.5** | 8.7 ± 21.5* | 4.8 ± 9.4** |
| NT-proBNP, pg/mL |  |  |  |  |
| Baseline | Mean ± SD | 95.8 ± 132.6 | 47.0 ± 45.0 | 138.6 ± 166.2 |
| Week 12 | Mean ± SD | 115.5 ± 206.0 | 44.3 ± 43.7 | 170.6 ± 260.0 |
|  | Change from baseline | 2.8 ± 72.2 | −3.8 ± 31.7 | 8.3 ± 93.7 |
| Week 24 | Mean ± SD | 126.1 ± 252.4 | 43.1 ± 34.8 | 206.6 ± 335.7 |
|  | Change from baseline | 18.0 ± 169.6 | −2.9 ± 20.9 | 39.6 ± 240.7 |

** *P* < 0.01, *** *P* < 0.001 vs. baseline, paired *t*-test.

*eGFR* creatinine-based estimated glomerular filtration rate, *NT-proBNP* N-terminal pro-brain natriuretic peptide, *PAC* plasma aldosterone concentration, *PRA* plasma renin activity, *SD* standard deviation.

**Table S10.** Incidence of serum potassium level ≥ 5.5 and ≥ 6.0 mEq/L (safety analysis set)

|  | **Total**  ***N* = 93** | **eGFR subcohorts** | |
| --- | --- | --- | --- |
| **G1–G2 subcohort**  **(≥ 60 mL/min/1.73 m2)**  ***n* = 49** | **G3 subcohort**  **(30 to < 60 mL/min/1.73 m2)**  ***n* = 44** |
| Serum potassium ≥ 5.5 mEq/L | 1 (1.1) | 1 (2.0) | 0 (0.0) |
| Serum potassium ≥ 6.0 mEq/L | 0 (0.0) | 0 (0.0) | 0 (0.0) |

Data are *n* (%).

*eGFR* creatinine-based estimated glomerular filtration rate.
